# Supplementary material for: Designing a high-performance anode composed of carbon nanotubes and Fe–Fe3C nanoparticles for quasi-solid-state fibrous Ni/Fe batteries
Source: Royal Society of Chemistry journal article supplement (doi:10.1039/d1qm00137j), 2021-01-01
Supplement: d1qm00137j1.pdf [file d1qm00137j1.pdf]

## Designing high-performance anode composed of carbon nanotubes and Fe-Fe<sub>3</sub>C nanoparticles for quasi-solid-state fibrous Ni/Fe batteries

Xiaoqin Li,<sup>a</sup> Taotao Gao,<sup>a</sup> Qilin Liu,<sup>c</sup> Yanxue Xu,<sup>a</sup> Jing Li,<sup>b\*</sup> Dan Xiao<sup>a,c\*</sup>

<sup>a</sup>Institute for Advanced Study, Chengdu University, Chengdu, P. R. China.

<sup>b</sup>College of Food and Biological Engineering, Chengdu University, Chengdu, P. R. China.

<sup>c</sup>College of Chemical Engineering, Sichuan University, Chengdu, P. R. China.

E-mail: [xiaodan@scu.edu.cn](mailto:xiaodan@scu.edu.cn); [lijing@cdu.edu.cn](mailto:lijing@cdu.edu.cn)

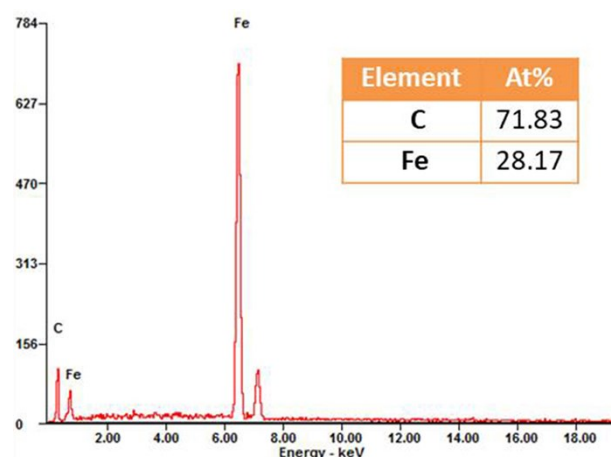

**Fig. S1.** The EDS spectrum of GE@CNT-Fe-Fe<sub>3</sub>C/CF for 3 min treatment and the corresponding elements content (the inset table).

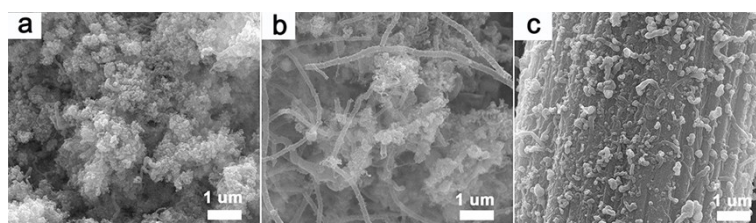

**Fig. S2.** The FESEM images of anodes with different microwave-assisted treatment time, (a) 2 min, (b) 3 min, and (c) 4 min.

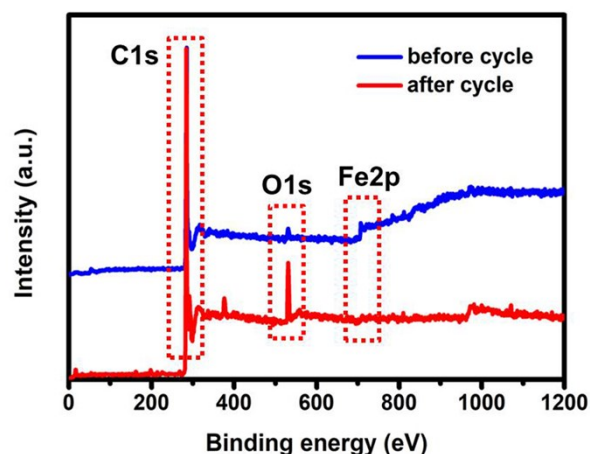

**Fig. S3.** XPS survey spectra of GE@CNT-Fe-Fe<sub>3</sub>C/CF before and after cyclic stability measurement.

**Table S1.** The element contents of GE@CNT-Fe-Fe<sub>3</sub>C/CF before and after cyclic stability measurement from XPS measurements.

|        | C     | Fe   | O     |
|--------|-------|------|-------|
| before | 95.85 | 1.17 | 2.98  |
| after  | 89.01 | 0.47 | 10.52 |

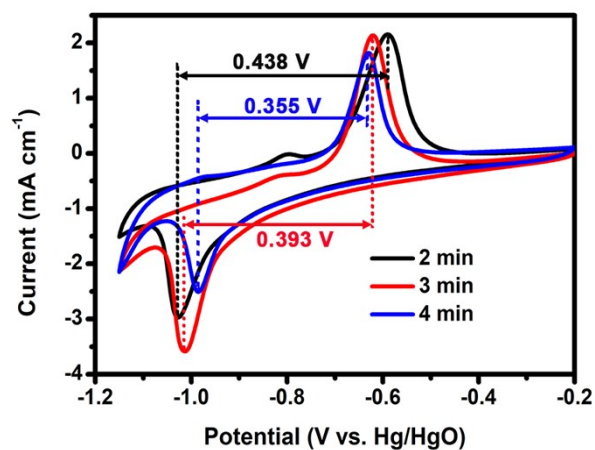

**Fig. S4.** The CV curves of anodes at 10 mV s<sup>-1</sup>.

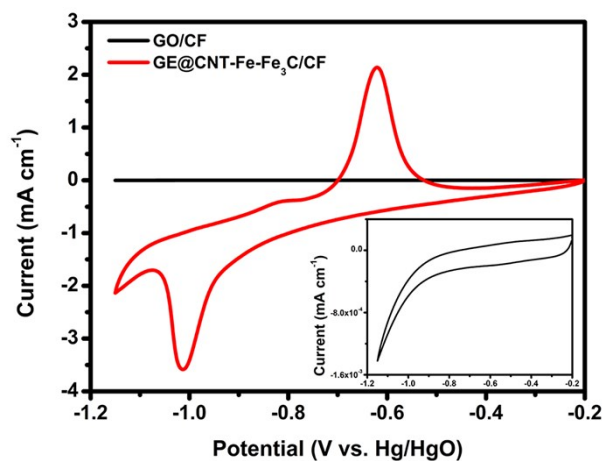

**Fig. S5.** The CV curves of GO/CF and GE@CNT-Fe-Fe<sub>3</sub>C/CF with 3 min microwave-assisted treatment time at 10 mV s<sup>-1</sup>.

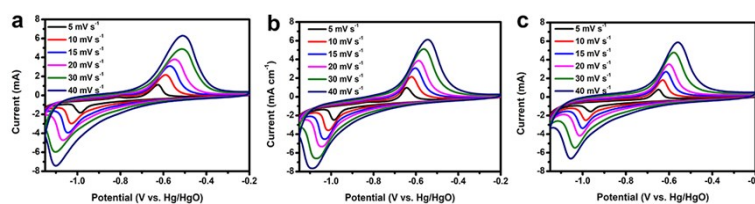

**Fig. S6.** The CV curves of GE@CNT-Fe-Fe<sub>3</sub>C/C anodes with different microwave-assisted treatment time at different scan rates from 5 mV s<sup>-1</sup> to 40 mV s<sup>-1</sup>, (a) 2 min, (b) 3 min, and (c) 4 min.

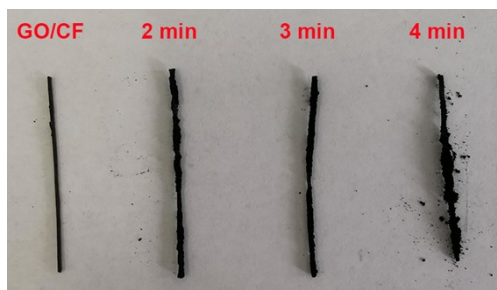

**Fig. S7.** The photographs of GO/CF and anodes with different microwave-assisted treatment time.

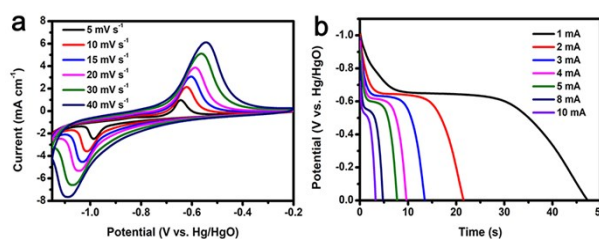

**Fig. S8.** The CV (a) and GCD (b) curves of GE@CNT-Fe-Fe<sub>3</sub>C/CF-3 anode with the microwave-assisted treatment for 3 min.

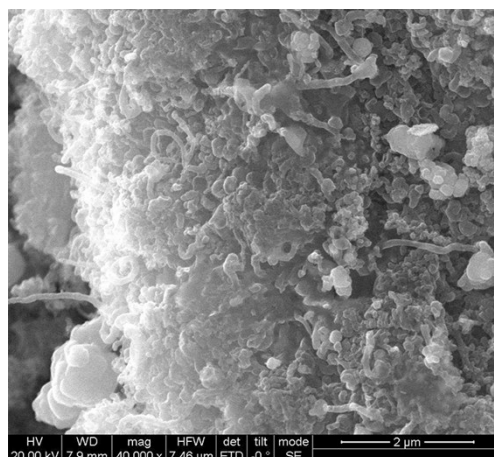

**Fig. S9.** The FESEM of GE@CNT-Fe-Fe<sub>3</sub>C/CF anode after electrochemical measurement.

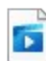

Video S1-1.mp4

Video S1. The state of anode after being fell heavily and bended. We can see that there are little active materials fall on the write paper.

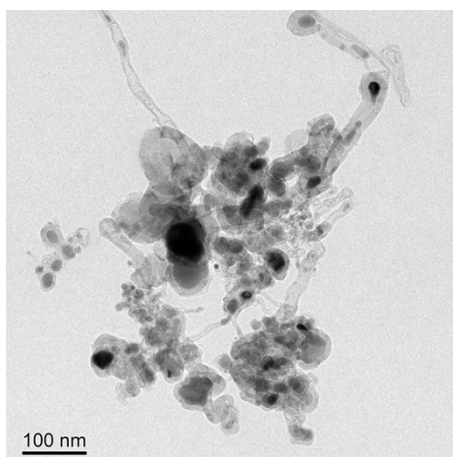

**Fig. S10.** The TEM of GE@CNT-Fe-Fe<sub>3</sub>C/CF anode after electrochemical measurement. We can see the mixed structure with nanotubes and nanoparticles, and the well-maintained core-shell structure also can be observed after long-term measurement.

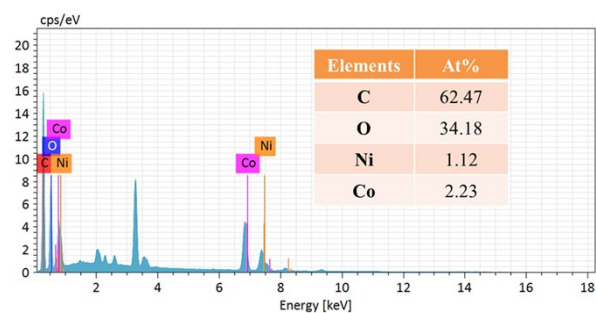

**Fig. S11.** The EDS spectrum of GE@NiCoO/CF cathode and the content of the corresponding element (the inset table).

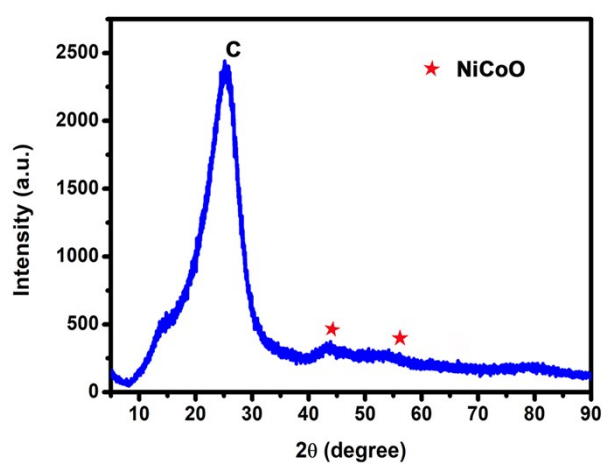

**Fig. S12.** XRD pattern of GE@NiCoO/CF.

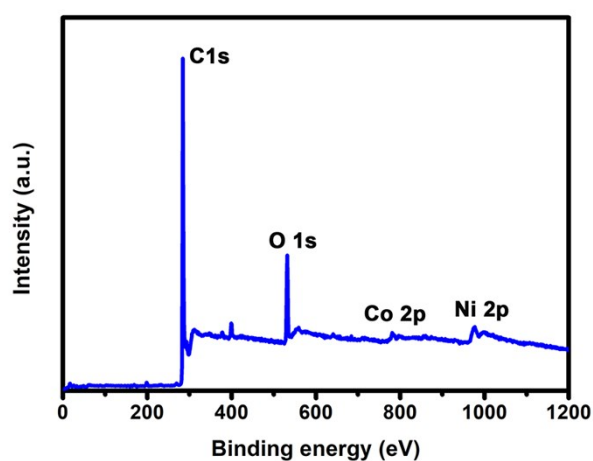

**Fig. S13.** XPS survey spectrum of GE@NiCoO/CF.

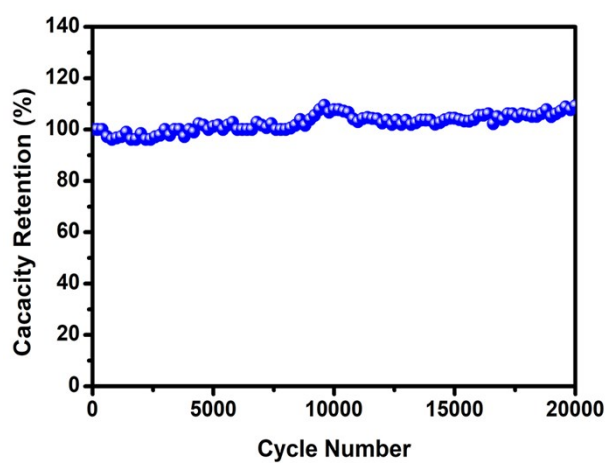

**Fig. S14.** The cyclic stability at  $5 \text{ mA cm}^{-1}$  of GE@NiCoO/CF cathode.

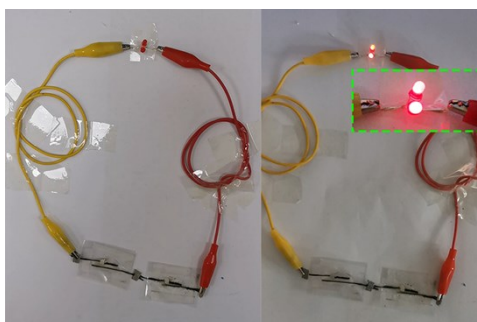

**Fig. S15.** The photographs of two red LEDs in series (left), and lit up by two charged Ni/Fe battery.
